# Supplementary material for: The contribution of temporal coding to odor coding and odor perception in humans
Source: eLife. 2020 Feb 7;9:e49734. doi: 10.7554/eLife.49734 (PMC7007219; doi:10.7554/eLife.49734)
Supplement: Figure 2—source data 1. [file elife-49734-fig2-data1.xlsx]

## Sheet: Figure2
ORG CIN - subj. told about TOMs	Figure 2A
exp		numTrials	numValid	AvgIR	Score
TOMs_300	300	20	18	0.995998	0.555556
TOMs_300	300	20	20	1	0.6
TOMs_300	300	20	17	0.996008	0.470588
TOMs_300	300	20	18	0.996941	0.5
TOMs_300	300	20	18	0.990916	0.388889
TOMs_300	300	20	18	0.985488	0.444444
TOMs_300	300	20	20	1	0.55
TOMs_300	300	20	15	0.984105	0.6
TOMs_300	300	20	20	1	0.55
TOMs_300	300	20	20	1	0.75
TOMs_600	600	20	16	0.974664	0.5
TOMs_600	600	20	17	0.972106	0.529412
TOMs_600	600	20	19	0.999562	0.578947
TOMs_600	600	20	17	0.990296	0.470588
TOMs_600	600	20	20	1	0.65
TOMs_600	600	20	20	1	0.5
TOMs_600	600	20	20	1	1
TOMs_600	600	20	19	0.989938	0.842105
TOMs_600	600	20	20	1	0.4
TOMs_AB OR AB_AC'	300	20	19	0.99831	1
TOMs_AB OR AB_AC'	300	20	20	1	0.8
TOMs_AB OR AB_AC'	300	20	20	1	0.65
TOMs_AB OR AB_AC'	300	20	18	0.990324	0.611111
TOMs_AB OR AB_AC'	300	20	15	0.90227	0.733333
TOMs_AB OR AB_AC'	300	20	20	1	0.9
TOMs_AB OR AB_AC'	300	20	20	1	1
TOMs_AB OR AB_AC'	300	20	19	0.999494	0.684211
TOMs_AB OR AB_AC'	300	20	20	1	0.75
TOMs_AB OR AB_BC'	300	20	19	0.993742	0.842105
TOMs_AB OR AB_BC'	300	20	20	1	0.9
TOMs_AB OR AB_BC'	300	20	18	0.997753	1
TOMs_AB OR AB_BC'	300	20	20	1	0.9
TOMs_AB OR AB_BC'	300	20	20	1	0.8
TOMs_AB OR AB_BC'	300	20	19	0.999875	0.947368
TOMs_A_A OR A_B'	300	20	20	1	0.75
TOMs_A_A OR A_B'	300	20	20	1	0.9
TOMs_A_A OR A_B'	300	20	19	0.998125	0.684211
TOMs_A_A OR A_B'	300	20	19	0.99775	0.947368
TOMs_A_A OR A_B'	300	20	18	0.995183	1
TOMs_A_A OR A_B'	300	20	20	1	0.9
TOMs_A_A OR A_B'	300	20	16	0.973987	0.9375
TOMs_B_B OR B_A'	300	20	17	0.967875	0.647059
TOMs_B_B OR B_A'	300	20	16	0.98675	0.6875
TOMs_B_B OR B_A'	300	20	19	0.99675	0.842105
TOMs_B_B OR B_A'	300	20	17	0.994134	0.941176
TOMs_B_B OR B_A'	300	20	18	0.995	1
TOMs_B_B OR B_A'	300	20	20	1	1
TOMs_B_B OR B_A'	300	20	19	0.99975	0.842105
