# Supplementary material for: The contribution of temporal coding to odor coding and odor perception in humans
Source: eLife. 2020 Feb 7;9:e49734. doi: 10.7554/eLife.49734 (PMC7007219; doi:10.7554/eLife.49734)
Supplement: Figure 3—source data 1. [file elife-49734-fig3-data1.xlsx]

## Sheet: Figure3
CIT DMTS- subj. unaware about TOMs		Figure 3A
exp	dt	numTrials	numValid	AvgIR	Score
dt75	75	20	19	0.975818	0.578947
dt75	75	20	20	1	0.45
dt75	75	20	19	0.991771	0.368421
dt75	75	20	18	0.959835	0.5
dt75	75	20	17	0.96766	0.647059
dt75	75	20	20	1	0.45
dt75	75	20	17	0.965847	0.764706
dt75	75	20	20	1	0.6
dt75	75	20	20	1	0.4
dt75	75	20	20	1	0.45
dt75	75	20	20	1	0.45
dt150	150	20	18	0.990632	0.444444
dt150	150	20	16	0.966607	0.5625
dt150	150	20	16	0.979413	0.5625
dt150	150	20	20	1	0.7
dt150	150	20	17	0.977793	0.470588
dt150	150	20	20	1	0.55
dt150	150	20	20	1	0.7
dt150	150	20	20	1	0.45
dt150	150	20	20	1	0.5
dt150	150	20	20	1	0.45
dt150	150	20	20	1	0.75
dt300	300	20	20	1	0.35
dt300	300	20	20	1	0.5
dt300	300	20	19	0.9875	0.526316
dt300	300	20	18	0.995517	0.555556
dt300	300	20	18	0.987359	0.777778
dt300	300	20	20	1	0.4
dt300	300	20	19	0.99675	0.631579
dt300	300	20	20	1	0.75
dt300	300	20	19	0.99775	0.736842
dt300	300	20	16	0.978779	0.625
dt300	300	20	20	1	0.65
dt300	300	20	14	0.974969	0.642857
dt300	300	20	20	1	0.5
dt600	600	20	18	0.985282	0.666667
dt600	600	20	15	0.968874	1
dt600	600	20	19	0.999564	0.684211
dt600	600	20	20	1	0.7
dt600	600	20	15	0.957166	0.533333
dt600	600	20	17	0.98769	0.588235
dt600	600	20	19	0.998188	0.684211
dt600	600	20	17	0.994826	0.470588
control1	300				1
control1	300				1
control1	300				0.85
control1	300				1
control1	300				1
control1	300				1
control1	300				1
control2	300				1
control2	300				1
control2	300				1
control2	300				1
control2	300				0.9375
control_with_AC	300				1
control_with_AC	300				0.733333
control_with_AC	300				0.95
control_with_AC	300				0.789474
control_with_AC	300				1
control_with_AC	300				0.75
control_with_AC	300				0.882353
control_with_AC	300				0.894737
control_with_AC	300				0.947368
control_with_AC	300				0.888889
control_with_BC	300				0.833333
control_with_BC	300				0.65
control_with_BC	300				0.9
control_with_BC	300				1
control_with_BC	300				0.684211
control_with_BC	300				0.933333
control_with_BC	300				0.75
control_with_BC	300				0.6875
control_with_BC	300				0.785714
