# Supplementary material for: The contribution of temporal coding to odor coding and odor perception in humans
Source: eLife. 2020 Feb 7;9:e49734. doi: 10.7554/eLife.49734 (PMC7007219; doi:10.7554/eLife.49734)
Supplement: Figure 4—source data 1. [file elife-49734-fig4-data1.xlsx]

## Sheet: Figure4 dt300ms
		a	a	a	a	a	a	a	a	a	a	a	a	b	b	b	b	b	b	b	b	b	b	b	b	ab	ab	ab	ab	ab	ab	ab	ab	ab	ab	ab	ab	ba	ba	ba	ba	ba	ba	ba	ba	ba	ba	ba	ba
	a	NaN	11.0454	15.3948	8.3666	10.9545	10.2956	18.0278	14.5602	11.6619	11.0905	16.0312	12.7279	12.9228	11.9164	9.69536	9.43398	9.27362	8.42615	11.4455	11.4891	13.6015	5.56776	15.5563	8.18535	5.83095	8.544	10.6301	7.4162	12.6491	8.48528	13.8564	14.9332	11.8322	7.4162	12.8062	9.53939	5	11	7.81025	6.9282	11.9583	8.7178	13.8564	14.1067	13.0384	7.48331	13.4536	10.4403
	a	11.0454	NaN	15.5885	8	14.1421	10.9545	19.7231	16	15.4919	15.0665	19.1572	15.1658	14.2478	15.2315	9.79796	4.3589	8.94427	7.81025	11.619	16.4317	15.5242	11.1803	13.4907	9.43398	12.1655	7.93725	11.0905	8.18535	11.7473	11.0454	14.4222	17.1756	14	12.2066	14.8324	10.1489	11.0905	14.5258	9.11043	6.63325	11	7.48331	14.4222	16.2788	14.6287	12.6491	16.9411	11.0905
	a	15.3948	15.5885	NaN	10.9087	7.68115	10.9087	6.48074	14.2478	11.619	9.16515	9.38083	6.08276	20.6882	10.3441	15.9687	15.0997	17.7482	13.9284	19.6977	18.4662	18.1659	16.3095	20.6155	13.784	16.5831	15.3623	7.48331	11.8322	9.84886	11.8743	3.87298	16.8523	7.68115	10.8628	9.94987	9.59166	16	11.8322	11.3137	13.8203	9.89949	11.619	3.87298	17.6068	18.2483	11.619	6.63325	7.74597
	a	8.3666	8	10.9087	NaN	8.48528	6.16441	14.1774	14.7648	11.7473	10.1489	14.0357	10.2956	16.4012	11.0454	10.8628	6.40312	12.083	5.56776	14.8661	14.7648	15.5885	9.53939	16.9115	9.74679	10.7703	8.30662	8.06226	3.87298	10.198	5.83095	9.79796	16.7631	9.89949	7.4162	11.6619	8.30662	9.84886	10.5357	7.54983	4	9.64365	3.16228	9.79796	16.2173	15.3623	8.60233	11.1803	7.93725
	a	10.9545	14.1421	7.68115	8.48528	NaN	9.79796	9.74679	13.5647	9.38083	5.91608	10.8167	7.87401	16.8819	10.2956	12.6491	13.0767	14	12.2882	15.7797	15.2315	15.7797	11.7047	18.6011	10.9087	12	12.6886	5.38516	8.18535	6.9282	7.74597	6.9282	15.2643	7.2111	6.40312	9.89949	7.93725	11.4455	10.9087	8.30662	10.8628	7	9.89949	6.9282	15.3948	15.9374	6.78233	6.08276	6.7082
	a	10.2956	10.9545	10.9087	6.16441	9.79796	NaN	14.8661	12.9615	10.7703	9.94987	12.3693	9.38083	18.8944	12.4097	13.6382	10.0499	14.4222	5.56776	17.3494	14.6969	14.9332	12.1244	17.8885	11.3578	13.4164	9.32738	9.32738	7.28011	11.4018	6.78233	10.2956	14.7309	10.6771	8.66025	8.48528	9.21954	12.53	12.1244	10.1489	8	11.0905	5.83095	10.2956	15	15.0333	9.89949	11.619	8.88819
	a	18.0278	19.7231	6.48074	14.1774	9.74679	14.8661	NaN	18.412	14.3875	12.083	9.89949	9.32738	23.7065	12.2066	18.9473	19.3907	21.0476	18.0555	22.9347	21.9317	21.4009	19.6469	25	17.72	19.105	19.5959	11.225	15.6844	13	14.3178	6.85565	21.0238	9.84886	13.784	13.6015	13.3417	18.3303	13.7113	14.6287	17.4642	13.1149	15.6525	6.85565	21.7256	21.5174	14.2478	6	11.4018
	a	14.5602	16	14.2478	14.7648	13.5647	12.9615	18.412	NaN	6.9282	11.9583	15.1327	11.1355	14.3875	16	11.5758	15.6525	14.1421	14.4568	15.843	9.79796	6.7082	13.7477	12	9	13.8564	13.2288	10.8167	14.4568	12.2474	14.5602	15.0333	4.3589	11.3137	12.0416	9.27362	9.11043	14.3178	16.2173	10.247	15.3623	12.0416	15.2315	15.0333	5.56776	7.61577	11.8322	14.2478	10.3441
	a	11.6619	15.4919	11.619	11.7473	9.38083	10.7703	14.3875	6.9282	NaN	7.81025	11.0905	7.48331	15.3297	11.7473	11.4891	14.7309	13.4907	13	15.3948	10.7703	9.21954	11.7047	14.7648	8.544	12	11.9583	7.93725	11.7898	10.583	11.6619	11.7473	9	6.63325	7.93725	7.34847	7.4162	11.9583	11.8743	8.544	13.2665	10.3441	13.1909	11.7473	9	9.27362	7.74597	9.32738	7.68115
	a	11.0905	15.0665	9.16515	10.1489	5.91608	9.94987	12.083	11.9583	7.81025	NaN	12.5698	8.06226	16.7929	8.88819	13.6015	13.9284	13.8924	12.7279	15.4272	13.3791	14	10.6771	16.8819	10.583	11.7898	10.6771	7.07107	9.59166	9.74679	11.0905	8.42615	13.3417	7.54983	4.24264	8.42615	8.7178	11.4018	9.59166	9.27362	12.2066	9.59166	11.3578	8.42615	12.7279	14.3178	4.58258	7.74597	8
	a	16.0312	19.1572	9.38083	14.0357	10.8167	12.3693	9.89949	15.1327	11.0905	12.5698	NaN	6.85565	22.9783	12.2066	18.3576	18.7083	19.975	15.748	22	19.5704	18.868	18.6548	23.388	15.8745	18.303	18.4932	10.8628	14.6969	13.4536	12.6886	9.53939	17.0294	8.88819	13.784	10.3441	11.7473	17.6068	12.9615	14.2829	16.5227	13.5647	14.7986	9.53939	18.6548	18.5742	14.2478	8.24621	10.4881
	a	12.7279	15.1658	6.08276	10.2956	7.87401	9.38083	9.32738	11.1355	7.48331	8.06226	6.85565	NaN	18.735	8.94427	14.1421	14.5945	16.0624	12.53	18.1384	15.6205	14.8661	14.1774	18.3303	11.1803	13.9284	13.6015	6.85565	11	10.583	10.6771	6.16441	13.8203	4.24264	9.11043	8.24621	7.14143	13.3791	9.84886	9.64365	12.8841	10.4403	11.1355	6.16441	14.4568	14.6287	9.69536	6.7082	5.38516
	b	12.9228	14.2478	20.6882	16.4012	16.8819	18.8944	23.7065	14.3875	15.3297	16.7929	22.9783	18.735	NaN	18.2483	7.14143	14.2127	8.06226	17.088	7.34847	11.619	11.0454	10.4881	8.66025	8.94427	8.66025	13.4907	14.2829	14.9666	14.5945	16.9411	19.6723	13.9284	16.5227	14.4222	18.303	12.4097	9.79796	17.6635	10.2956	15	14	17	19.6723	12	10.9087	13.4536	19.5448	14.6287
	b	11.9164	15.2315	10.3441	11.0454	10.2956	12.4097	12.2066	16	11.7473	8.88819	12.2066	8.94427	18.2483	NaN	15.4919	14.2478	15.4272	13.6748	16.6433	16.4924	17.4642	12.6095	18.7083	12.7671	12.8062	12.6886	9.32738	10.8167	13.7113	13.784	8.24621	17.4642	8.3666	9.11043	12.1655	10.1489	12.2882	2.23607	11.2694	13.0384	13.3041	12.083	8.24621	16.8226	17.2047	9.59166	9.53939	9.74679
	b	9.69536	9.79796	15.9687	10.8628	12.6491	13.6382	18.9473	11.5758	11.4891	13.6015	18.3576	14.1421	7.14143	15.4919	NaN	9.84886	6.78233	11.9583	9	10.7703	9.32738	8.77496	10.2956	5.19615	7.48331	10.4403	9.94987	10.7238	10.2956	11.4018	15.2971	12.6886	12.083	10.7238	14.0712	7.93725	7.68115	15	5	10	9.53939	11.9164	15.2971	11.5326	8.94427	10.198	14.9332	9.84886
	b	9.43398	4.3589	15.0997	6.40312	13.0767	10.0499	19.3907	15.6525	14.7309	13.9284	18.7083	14.5945	14.2127	14.2478	9.84886	NaN	10.0499	6	12.49	14.3875	15.6205	8.83176	14.1067	9.16515	10.9087	7.2111	11.0454	6	12.3693	10.0499	14.3178	16.9115	13.8924	10.7703	14.6629	10.3923	10.4881	13.4907	8.7178	3.87298	11.6619	5.74456	14.3178	15.9374	15.1327	11.5326	16.2481	11.225
	b	9.27362	8.94427	17.7482	12.083	14	14.4222	21.0476	14.1421	13.4907	13.8924	19.975	16.0624	8.06226	15.4272	6.78233	10.0499	NaN	12.3693	3.60555	13.2665	11.5326	8.544	10	6.40312	8.48528	8.66025	11	10.9087	11.0454	13.0384	16.3095	13.7477	13.6382	11	14.4914	9.74679	7.54983	14.7309	7.81025	10.583	10.247	12.5698	16.3095	12.2066	10.198	10.198	16.7631	11.619
	b	8.42615	7.81025	13.9284	5.56776	12.2882	5.56776	18.0555	14.4568	13	12.7279	15.748	12.53	17.088	13.6748	11.9583	6	12.3693	NaN	15.3623	13.8924	15.1658	10.0995	16.5831	10.2956	12.0416	7.74597	11.0454	6.32456	12.8452	7.68115	13.3041	15.748	13	9.89949	11.619	10.2956	11.3137	12.9615	9.69536	4.3589	12.2474	4.3589	13.3041	15.5563	14.8661	11	14.5602	10.7703
	b	11.4455	11.619	19.6977	14.8661	15.7797	17.3494	22.9347	15.843	15.3948	15.4272	22	18.1384	7.34847	16.6433	9	12.49	3.60555	15.3623	NaN	14.5258	13.1909	9.89949	10.0499	8.48528	9.74679	10.9545	12.8841	13.1149	12.8452	15.843	18.1934	14.8997	15.5242	12.9615	16.7631	11.9164	9.27362	16	10.198	13.3041	12.1655	15.2643	18.1934	13.1149	11.8743	11.9583	18.7083	13.784
	b	11.4891	16.4317	18.4662	14.7648	15.2315	14.6969	21.9317	9.79796	10.7703	13.3791	19.5704	15.6205	11.619	16.4924	10.7703	14.3875	13.2665	13.8924	14.5258	NaN	8.30662	9.11043	12.49	9.84886	10.0995	12.1244	14.1067	13.8203	15.8745	15.0997	18.5472	9.64365	15.2971	11.5326	13.7113	12.53	11.7898	16.0312	11	13.8564	15.3948	15.3623	18.5472	8.30662	10	11.3137	16.8226	14.3178
	b	13.6015	15.5242	18.1659	15.5885	15.7797	14.9332	21.4009	6.7082	9.21954	14	18.868	14.8661	11.0454	17.4642	9.32738	15.6205	11.5326	15.1658	13.1909	8.30662	NaN	12.4097	9.53939	8.60233	11.8743	12.3288	12.9615	15.4272	13.9642	15.6525	17.9722	6.9282	13.6015	12.6491	12.2882	10.6771	12.3288	17.088	10.2956	15.5242	13.4907	16.5227	17.9722	5.2915	3.31662	11.9583	16.6132	12.6491
	b	5.56776	11.1803	16.3095	9.53939	11.7047	12.1244	19.6469	13.7477	11.7047	10.6771	18.6548	14.1774	10.4881	12.6095	8.77496	8.83176	8.544	10.0995	9.89949	9.11043	12.4097	NaN	12.53	7.2111	5	6.9282	11.0454	7.74597	13	11.2694	15.1987	14.0712	12.8452	7.07107	14.0357	10.198	5.83095	11.7473	7.74597	7.93725	12.3288	10.1489	15.1987	12.1655	12.2882	7	14.9666	11.4018
	b	15.5563	13.4907	20.6155	16.9115	18.6011	17.8885	25	12	14.7648	16.8819	23.388	18.3303	8.66025	18.7083	10.2956	14.1067	10	16.5831	10.0499	12.49	9.53939	12.53	NaN	9.21954	12.5698	11.5326	14.7986	15.6525	15.748	18.7083	19.9499	11.7898	16.6132	15.1987	17.2627	12.6095	13.1529	18.1384	12.0416	15.9374	15.1987	17.088	19.9499	9	9.05539	14.6287	21.0476	14.6629
	b	8.18535	9.43398	13.784	9.74679	10.9087	11.3578	17.72	9	8.544	10.583	15.8745	11.1803	8.94427	12.7671	5.19615	9.16515	6.40312	10.2956	8.48528	9.84886	8.60233	7.2111	9.21954	NaN	7.28011	7.87401	7.61577	8.83176	9.21954	10.7238	13.1529	9.89949	9.43398	8.12404	11.0905	5.47723	7.2111	12.4097	4	9.11043	8.48528	10.3441	13.1529	8.7178	7.54983	7.68115	13.3417	7.34847
	ab	5.83095	12.1655	16.5831	10.7703	12	13.4164	19.105	13.8564	12	11.7898	18.303	13.9284	8.66025	12.8062	7.48331	10.9087	8.48528	12.0416	9.74679	10.0995	11.8743	5	12.5698	7.28011	NaN	9.53939	11.0905	9.53939	13.0384	11.4018	14.9666	14.3875	12.3288	8.544	14.9666	9.32738	2.64575	11.9583	7.14143	9.79796	12.3693	11.4891	14.9666	12.6886	11.7473	8	14.7986	10.7238
	ab	8.544	7.93725	15.3623	8.30662	12.6886	9.32738	19.5959	13.2288	11.9583	10.6771	18.4932	13.6015	13.4907	12.6886	10.4403	7.2111	8.66025	7.74597	10.9545	12.1244	12.3288	6.9282	11.5326	7.87401	9.53939	NaN	10.583	7.48331	12.53	11.5326	14.1067	13.9284	12.53	7.74597	12.2066	9.69536	8.83176	11.8322	8.7178	7.54983	11.8322	8.42615	14.1067	12	11.8743	8.18535	15.4919	10.6771
	ab	10.6301	11.0905	7.48331	8.06226	5.38516	9.32738	11.225	10.8167	7.93725	7.07107	10.8628	6.85565	14.2829	9.32738	9.94987	11.0454	11	11.0454	12.8841	14.1067	12.9615	11.0454	14.7986	7.61577	11.0905	10.583	NaN	7.74597	4.79583	8.77496	6.55744	12.5698	5.19615	6.9282	8.18535	3.74166	10.3923	9.79796	5.47723	10.0499	4.47214	9.21954	6.55744	12.6491	12.6886	7	7.61577	3.4641
	ab	7.4162	8.18535	11.8322	3.87298	8.18535	7.28011	15.6844	14.4568	11.7898	9.59166	14.6969	11	14.9666	10.8167	10.7238	6	10.9087	6.32456	13.1149	13.8203	15.4272	7.74597	15.6525	8.83176	9.53939	7.48331	7.74597	NaN	9.84886	6.55744	10.5357	15.748	10.5357	6.9282	11.9583	8.12404	8.94427	10.198	7.48331	4.12311	9.38083	3.87298	10.5357	15.0997	15.1987	7.93725	12.2474	8.24621
	ab	12.6491	11.7473	9.84886	10.198	6.9282	11.4018	13	12.2474	10.583	9.74679	13.4536	10.583	14.5945	13.7113	10.2956	12.3693	11.0454	12.8452	12.8452	15.8745	13.9642	13	15.748	9.21954	13.0384	12.53	4.79583	9.84886	NaN	9.38083	9.48683	13.4536	8.94427	9.53939	9.89949	6.85565	12.2066	14.1774	7.28011	11.5758	1	11.1355	9.48683	13.8924	13.7113	9.27362	9.94987	6.85565
	ab	8.48528	11.0454	11.8743	5.83095	7.74597	6.78233	14.3178	14.5602	11.6619	11.0905	12.6886	10.6771	16.9411	13.784	11.4018	10.0499	13.0384	7.68115	15.843	15.0997	15.6525	11.2694	18.7083	10.7238	11.4018	11.5326	8.77496	6.55744	9.38083	NaN	10.9545	16.0935	10.7703	8.88819	11.3137	8.88819	10.4403	13.4536	8.544	6.9282	9.11043	6.32456	10.9545	16.4621	15.5563	9.59166	11	8.544
	ab	13.8564	14.4222	3.87298	9.79796	6.9282	10.2956	6.85565	15.0333	11.7473	8.42615	9.53939	6.16441	19.6723	8.24621	15.2971	14.3178	16.3095	13.3041	18.1934	18.5472	17.9722	15.1987	19.9499	13.1529	14.9666	14.1067	6.55744	10.5357	9.48683	10.9545	NaN	17.2916	6.78233	9.74679	10.2956	8.544	14.0357	9.53939	10.5357	12.8841	9.43398	10.583	0	17.6352	17.8885	10.3923	6.55744	6.7082
	ab	14.9332	17.1756	16.8523	16.7631	15.2643	14.7309	21.0238	4.3589	9	13.3417	17.0294	13.8203	13.9284	17.4642	12.6886	16.9115	13.7477	15.748	14.8997	9.64365	6.9282	14.0712	11.7898	9.89949	14.3875	13.9284	12.5698	15.748	13.4536	16.0935	17.2916	NaN	13.7477	13.3417	10.247	11.0454	14.8997	17.5499	11.9164	16.7033	13.2665	16.9411	17.2916	4	7.68115	12.8452	16.3707	12.7279
	ab	11.8322	14	7.68115	9.89949	7.2111	10.6771	9.84886	11.3137	6.63325	7.54983	8.88819	4.24264	16.5227	8.3666	12.083	13.8924	13.6382	13	15.5242	15.2971	13.6015	12.8452	16.6132	9.43398	12.3288	12.53	5.19615	10.5357	8.94427	10.7703	6.78233	13.7477	NaN	7.93725	9.05539	5.74456	11.5326	9	7.81025	12.4097	8.66025	11.4891	6.78233	13.6748	12.9615	8	6.40312	4.12311
	ab	7.4162	12.2066	10.8628	7.4162	6.40312	8.66025	13.784	12.0416	7.93725	4.24264	13.784	9.11043	14.4222	9.11043	10.7238	10.7703	11	9.89949	12.9615	11.5326	12.6491	7.07107	15.1987	8.12404	8.544	7.74597	6.9282	6.9282	9.53939	8.88819	9.74679	13.3417	7.93725	NaN	9.32738	7.61577	8	9.05539	6.78233	8.77496	9.05539	8.88819	9.74679	12.2474	12.6886	1.73205	9.05539	7.48331
	ab	12.8062	14.8324	9.94987	11.6619	9.89949	8.48528	13.6015	9.27362	7.34847	8.42615	10.3441	8.24621	18.303	12.1655	14.0712	14.6629	14.4914	11.619	16.7631	13.7113	12.2882	14.0357	17.2627	11.0905	14.9666	12.2066	8.18535	11.9583	9.89949	11.3137	10.2956	10.247	9.05539	9.32738	NaN	8.77496	14.3178	12.6886	10.4403	13.2665	9.74679	12.2474	10.2956	11.619	12.49	9.59166	9.21954	9
	ab	9.53939	10.1489	9.59166	8.30662	7.93725	9.21954	13.3417	9.11043	7.4162	8.7178	11.7473	7.14143	12.4097	10.1489	7.93725	10.3923	9.74679	10.2956	11.9164	12.53	10.6771	10.198	12.6095	5.47723	9.32738	9.69536	3.74166	8.12404	6.85565	8.88819	8.544	11.0454	5.74456	7.61577	8.77496	NaN	8.7178	10.198	4	9.64365	6.32456	9.11043	8.544	10.9545	10.247	7.54983	9.69536	2.82843
	ba	5	11.0905	16	9.84886	11.4455	12.53	18.3303	14.3178	11.9583	11.4018	17.6068	13.3791	9.79796	12.2882	7.68115	10.4881	7.54983	11.3137	9.27362	11.7898	12.3288	5.83095	13.1529	7.2111	2.64575	8.83176	10.3923	8.94427	12.2066	10.4403	14.0357	14.8997	11.5326	8	14.3178	8.7178	NaN	11.4018	6.78233	9.11043	11.4891	10.6301	14.0357	13.3417	11.7898	7.4162	14.1421	9.89949
	ba	11	14.5258	11.8322	10.5357	10.9087	12.1244	13.7113	16.2173	11.8743	9.59166	12.9615	9.84886	17.6635	2.23607	15	13.4907	14.7309	12.9615	16	16.0312	17.088	11.7473	18.1384	12.4097	11.9583	11.8322	9.79796	10.198	14.1774	13.4536	9.53939	17.5499	9	9.05539	12.6886	10.198	11.4018	NaN	11.1355	12.2882	13.7113	11.619	9.53939	16.6733	16.7631	9.53939	10.6771	10.0995
	ba	7.81025	9.11043	11.3137	7.54983	8.30662	10.1489	14.6287	10.247	8.544	9.27362	14.2829	9.64365	10.2956	11.2694	5	8.7178	7.81025	9.69536	10.198	11	10.2956	7.74597	12.0416	4	7.14143	8.7178	5.47723	7.48331	7.28011	8.544	10.5357	11.9164	7.81025	6.78233	10.4403	4	6.78233	11.1355	NaN	7.93725	6.48074	8.77496	10.5357	11.225	9.94987	6.55744	10.583	5.47723
	ba	6.9282	6.63325	13.8203	4	10.8628	8	17.4642	15.3623	13.2665	12.2066	16.5227	12.8841	15	13.0384	10	3.87298	10.583	4.3589	13.3041	13.8564	15.5242	7.93725	15.9374	9.11043	9.79796	7.54983	10.0499	4.12311	11.5758	6.9282	12.8841	16.7033	12.4097	8.77496	13.2665	9.64365	9.11043	12.2882	7.93725	NaN	10.9087	3.74166	12.8841	16.0312	15.0997	9.69536	14.0357	10.0499
	ba	11.9583	11	9.89949	9.64365	7	11.0905	13.1149	12.0416	10.3441	9.59166	13.5647	10.4403	14	13.3041	9.53939	11.6619	10.247	12.2474	12.1655	15.3948	13.4907	12.3288	15.1987	8.48528	12.3693	11.8322	4.47214	9.38083	1	9.11043	9.43398	13.2665	8.66025	9.05539	9.74679	6.32456	11.4891	13.7113	6.48074	10.9087	NaN	10.6301	9.43398	13.5647	13.1529	8.77496	9.89949	6.48074
	ba	8.7178	7.48331	11.619	3.16228	9.89949	5.83095	15.6525	15.2315	13.1909	11.3578	14.7986	11.1355	17	12.083	11.9164	5.74456	12.5698	4.3589	15.2643	15.3623	16.5227	10.1489	17.088	10.3441	11.4891	8.42615	9.21954	3.87298	11.1355	6.32456	10.583	16.9411	11.4891	8.88819	12.2474	9.11043	10.6301	11.619	8.77496	3.74166	10.6301	NaN	10.583	16.6433	16.2481	10.0995	13	8.88819
	ba	13.8564	14.4222	3.87298	9.79796	6.9282	10.2956	6.85565	15.0333	11.7473	8.42615	9.53939	6.16441	19.6723	8.24621	15.2971	14.3178	16.3095	13.3041	18.1934	18.5472	17.9722	15.1987	19.9499	13.1529	14.9666	14.1067	6.55744	10.5357	9.48683	10.9545	0	17.2916	6.78233	9.74679	10.2956	8.544	14.0357	9.53939	10.5357	12.8841	9.43398	10.583	NaN	17.6352	17.8885	10.3923	6.55744	6.7082
	ba	14.1067	16.2788	17.6068	16.2173	15.3948	15	21.7256	5.56776	9	12.7279	18.6548	14.4568	12	16.8226	11.5326	15.9374	12.2066	15.5563	13.1149	8.30662	5.2915	12.1655	9	8.7178	12.6886	12	12.6491	15.0997	13.8924	16.4621	17.6352	4	13.6748	12.2474	11.619	10.9545	13.3417	16.6733	11.225	16.0312	13.5647	16.6433	17.6352	NaN	6.08276	11.619	16.9115	12.7279
	ba	13.0384	14.6287	18.2483	15.3623	15.9374	15.0333	21.5174	7.61577	9.27362	14.3178	18.5742	14.6287	10.9087	17.2047	8.94427	15.1327	10.198	14.8661	11.8743	10	3.31662	12.2882	9.05539	7.54983	11.7473	11.8743	12.6886	15.1987	13.7113	15.5563	17.8885	7.68115	12.9615	12.6886	12.49	10.247	11.7898	16.7631	9.94987	15.0997	13.1529	16.2481	17.8885	6.08276	NaN	11.9164	16.7631	12.1244
	ba	7.48331	12.6491	11.619	8.60233	6.78233	9.89949	14.2478	11.8322	7.74597	4.58258	14.2478	9.69536	13.4536	9.59166	10.198	11.5326	10.198	11	11.9583	11.3137	11.9583	7	14.6287	7.68115	8	8.18535	7	7.93725	9.27362	9.59166	10.3923	12.8452	8	1.73205	9.59166	7.54983	7.4162	9.53939	6.55744	9.69536	8.77496	10.0995	10.3923	11.619	11.9164	NaN	9.32738	7.68115
	ba	13.4536	16.9411	6.63325	11.1803	6.08276	11.619	6	14.2478	9.32738	7.74597	8.24621	6.7082	19.5448	9.53939	14.9332	16.2481	16.7631	14.5602	18.7083	16.8226	16.6132	14.9666	21.0476	13.3417	14.7986	15.4919	7.61577	12.2474	9.94987	11	6.55744	16.3707	6.40312	9.05539	9.21954	9.69536	14.1421	10.6771	10.583	14.0357	9.89949	13	6.55744	16.9115	16.7631	9.32738	NaN	8.3666
	ba	10.4403	11.0905	7.74597	7.93725	6.7082	8.88819	11.4018	10.3441	7.68115	8	10.4881	5.38516	14.6287	9.74679	9.84886	11.225	11.619	10.7703	13.784	14.3178	12.6491	11.4018	14.6629	7.34847	10.7238	10.6771	3.4641	8.24621	6.85565	8.544	6.7082	12.7279	4.12311	7.48331	9	2.82843	9.89949	10.0995	5.47723	10.0499	6.48074	8.88819	6.7082	12.7279	12.1244	7.68115	8.3666	NaN

## Sheet: Figure4 dt600ms
	a	a	a	a	a	a	a	a	a	b	b	b	b	b	b	b	b	b	ab	ab	ab	ab	ab	ab	ab	ab	ab	ba	ba	ba	ba	ba	ba	ba	ba	ba
a	NaN	14.1067	11.2694	11.0454	5.74456	19.4679	15.2643	11.4018	4.69042	24.2693	18.303	15.3623	20.5426	18.4932	19.1572	21.7025	20.199	17.8045	14.1067	16.4924	11.7898	17.4069	13.1909	22.5167	23.1517	5.56776	14.2478	12.6491	14.6629	13.6015	11.5326	16.4317	18.3576	20.9523	15.7797	14.8997
a	14.1067	NaN	9.59166	16.6433	16.7332	12.49	10.9545	13.1529	13.4536	19.0788	9.27362	7.14143	16.6433	13.6015	11.0454	15.748	13.4536	8.83176	13.0384	6.245	10.6771	18.4391	15.7162	17.2627	18.412	11.4891	8.94427	6.55744	3.16228	10.6771	14.8997	14.5258	12.6491	15.8745	11.0454	8.77496
a	11.2694	9.59166	NaN	11.1803	13.1909	10.7703	7.07107	6.7082	8.544	17.6635	12.4097	9.43398	12.6886	12.4499	10.7703	14.2127	13.3791	10.583	10.2956	10.4403	4	11.9164	12.2882	13.5647	15.1987	7.61577	4.89898	5.74456	8.94427	3.4641	7.74597	10.8167	8.94427	13.0384	9.05539	5.19615
a	11.0454	16.6433	11.1803	NaN	11.7047	18.412	13.4536	12.5698	8.83176	21.095	18.6815	14.8997	17.0294	18.1108	18.1934	19.3649	19.6977	18.6815	14.3178	17.6635	10.9087	12.0416	14.5602	19.6214	20.1494	9.43398	13.8924	14.3527	16.4012	12.1244	6.245	15.6205	16.9411	17.9165	14.3875	15.0333
a	5.74456	16.7332	13.1909	11.7047	NaN	20.6882	16.4924	13.3791	7.14143	25.4558	20.7364	17.4642	21.095	19.5192	20.5426	23.5797	22.6053	20.445	14.9666	19.3132	14	18.1108	13.4536	23.4521	24.3516	8.24621	15.9374	15.3297	17.4929	15.4919	12.2474	17.1756	19.4422	22.2711	18.3848	16.9411
a	19.4679	12.49	10.7703	18.412	20.6882	NaN	11.5758	15.6525	17.5784	13.2665	10.9545	8.66025	9.11043	11.7047	4.69042	10.0995	10.7238	8.12404	14.6969	10.1489	11.4891	13.6382	16.7033	6.32456	10.6301	15.748	7.48331	11	10.7703	9.89949	14.4914	12.6095	3.16228	9.48683	12	7.54983
a	15.2643	10.9545	7.07107	13.4536	16.4924	11.5758	NaN	12.2066	12.53	19.6469	13.5647	11.7047	13.7477	14.3875	11.9164	15.5563	14.8661	12.2474	13.4164	12.0416	8.83176	13.9284	15.5885	13.4907	15.5242	12.1655	6.16441	9.11043	10.4881	6.48074	11.3137	12.6886	9.69536	13.1909	12	7.28011
a	11.4018	13.1529	6.7082	12.5698	13.3791	15.6525	12.2066	NaN	8.60233	20.3715	16.0312	13.3417	16.7332	15.748	15.6525	17.6918	16.4317	14.2478	11.5326	14.2127	6.40312	15.0665	14.7648	18.3576	19.4422	7.4162	10.5357	8.60233	12.53	8.66025	10.5357	14.8997	14.0357	17.2337	10.8167	10.198
a	4.69042	13.4536	8.544	8.83176	7.14143	17.5784	12.53	8.60233	NaN	22.7376	17.1172	14.2127	18.3303	17.088	17.6918	19.8746	18.7083	16.6433	11.8743	15.4919	9.53939	14.8661	12.9615	20.1246	20.8806	4.58258	11.9583	10.9545	13.6015	11.1803	8.544	15.0997	16.1555	18.412	13.7477	12.8062
b	24.2693	19.0788	17.6635	21.095	25.4558	13.2665	19.6469	20.3715	22.7376	NaN	13.9284	13.8203	8.18535	11.9583	13.1909	6.48074	10.1489	15.2971	15.6205	15.1987	15.8745	14	16.4012	12	9.11043	20.7364	16.7929	16.0935	17.088	16.1864	17.6068	13.2288	13.4164	9.69536	12.8841	16.3401
b	18.303	9.27362	12.4097	18.6815	20.7364	10.9545	13.5647	16.0312	17.1172	13.9284	NaN	7.93725	13.5277	7.54983	8.60233	9.38083	6.245	6	13.5647	3.60555	12.2474	17.8326	15	13.9284	13.8203	14.9666	10.198	9.64365	6.78233	12.1655	16.3095	11.7047	11.5758	11.5758	7.48331	9.53939
b	15.3623	7.14143	9.43398	14.8997	17.4642	8.66025	11.7047	13.3417	14.2127	13.8203	7.93725	NaN	12.4097	11.4891	7.81025	11.4455	10.3923	7.28011	11.5326	6.16441	9.53939	14.7986	14.8324	13.3041	14.6969	11.619	8.42615	7.48331	5.74456	9.84886	12.8452	12.8841	9.32738	12.4499	8.88819	8.3666
b	20.5426	16.6433	12.6886	17.0294	21.095	9.11043	13.7477	16.7332	18.3303	8.18535	13.5277	12.4097	NaN	10.4881	10.247	7.28011	10.7703	13.7477	13	14	11.8743	8.42615	13.2665	6.40312	5.09902	17.2337	11.619	13.0384	15	11	12.4499	9.16515	7.93725	5.19615	11.7898	11.8322
b	18.4932	13.6015	12.4499	18.1108	19.5192	11.7047	14.3875	15.748	17.088	11.9583	7.54983	11.4891	10.4881	NaN	9.53939	8.30662	7.2111	10.247	12.4499	9.48683	11.9583	15.5885	10.7703	12.53	11.4018	15.3948	11.0905	11.4891	11.7047	11.7898	14.7309	6.63325	11.1803	10.1489	8.30662	10.583
b	19.1572	11.0454	10.7703	18.1934	20.5426	4.69042	11.9164	15.6525	17.6918	13.1909	8.60233	7.81025	10.247	9.53939	NaN	9.79796	9.74679	6	15.4272	7.93725	11.1355	15.1658	15.906	8.83176	11.9583	15.3623	7.2111	10.7238	9.27362	9.69536	14.8324	11.5326	6	10.6771	10.4881	6.85565
b	21.7025	15.748	14.2127	19.3649	23.5797	10.0995	15.5563	17.6918	19.8746	6.48074	9.38083	11.4455	7.28011	8.30662	9.79796	NaN	4.79583	10.7703	14	10.9087	12.8841	13.1909	14.7986	8.94427	6.40312	18.1108	12.5698	12.6886	13.2665	12.5698	15.6844	10.247	10	6	8.94427	11.9583
b	20.199	13.4536	13.3791	19.6977	22.6053	10.7238	14.8661	16.4317	18.7083	10.1489	6.245	10.3923	10.7703	7.2111	9.74679	4.79583	NaN	8.18535	13.3041	8	12.2066	15.843	14.5602	11.619	10.0995	16.6433	11.7047	10.7703	10.7238	12.2066	16.5227	10.4881	10.7238	8.88819	7.14143	10.6771
b	17.8045	8.83176	10.583	18.6815	20.445	8.12404	12.2474	14.2478	16.6433	15.2971	6	7.28011	13.7477	10.247	6	10.7703	8.18535	NaN	15.1658	4.3589	10.583	17.5499	16.7033	12.5698	14.5945	13.9284	7.61577	8.77496	6.16441	10.0995	16.1245	13.1529	9.05539	12.7279	8.48528	6.40312
ab	14.1067	13.0384	10.2956	14.3178	14.9666	14.6969	13.4164	11.5326	11.8743	15.6205	13.5647	11.5326	13	12.4499	15.4272	14	13.3041	15.1658	NaN	13.2288	10.583	13.2665	10.3441	16.3707	15.0665	11.8322	12.7279	8.88819	12.49	11.6619	10.9545	11.1803	13.1909	13.1149	10.9545	12.7671
ab	16.4924	6.245	10.4403	17.6635	19.3132	10.1489	12.0416	14.2127	15.4919	15.1987	3.60555	6.16441	14	9.48683	7.93725	10.9087	8	4.3589	13.2288	NaN	10.5357	17.4069	15.0333	14.1774	14.8324	13.1529	8.42615	7.34847	3.60555	10.4403	15.3297	12.2474	10.7238	12.53	7.54983	7.61577
ab	11.7898	10.6771	4	10.9087	14	11.4891	8.83176	6.40312	9.53939	15.8745	12.2474	9.53939	11.8743	11.9583	11.1355	12.8841	12.2066	10.583	10.583	10.5357	NaN	11.1355	11.8743	13.784	14.6629	7.48331	6.63325	5.74456	9.48683	3.74166	8.12404	10.5357	9.79796	12.5698	7.2111	6.40312
ab	17.4069	18.4391	11.9164	12.0416	18.1108	13.6382	13.9284	15.0665	14.8661	14	17.8326	14.7986	8.42615	15.5885	15.1658	13.1909	15.843	17.5499	13.2665	17.4069	11.1355	NaN	13.3791	11.6619	11	15.0997	13.1149	14.1774	17.3205	10.9545	7.61577	12.0416	11.8322	10.2956	13.8564	13.8924
ab	13.1909	15.7162	12.2882	14.5602	13.4536	16.7033	15.5885	14.7648	12.9615	16.4012	15	14.8324	13.2665	10.7703	15.906	14.7986	14.5602	16.7033	10.3441	15.0333	11.8743	13.3791	NaN	17.2916	15.3623	12.8452	14.1067	12.49	15.3297	12.53	11.2694	6.48074	15.0665	14.5945	12.9228	14.2127
ab	22.5167	17.2627	13.5647	19.6214	23.4521	6.32456	13.4907	18.3576	20.1246	12	13.9284	13.3041	6.40312	12.53	8.83176	8.94427	11.619	12.5698	16.3707	14.1774	13.784	11.6619	17.2916	NaN	6.245	19.0788	10.8628	14.5258	15.3623	11.8322	15.0997	12.2882	5.83095	6.63325	13.784	11.0905
ab	23.1517	18.412	15.1987	20.1494	24.3516	10.6301	15.5242	19.4422	20.8806	9.11043	13.8203	14.6969	5.09902	11.4018	11.9583	6.40312	10.0995	14.5945	15.0665	14.8324	14.6629	11	15.3623	6.245	NaN	20.1742	13.6015	14.9666	16.4621	13.3791	15.4596	10.583	9.74679	3.87298	13.1529	13.5647
ab	5.56776	11.4891	7.61577	9.43398	8.24621	15.748	12.1655	7.4162	4.58258	20.7364	14.9666	11.619	17.2337	15.3948	15.3623	18.1108	16.6433	13.9284	11.8322	13.1529	7.48331	15.0997	12.8452	19.0788	20.1742	NaN	10.4881	9.11043	11.3137	9.89949	9.48683	14.3875	14.6969	17.72	11.5758	11
ab	14.2478	8.94427	4.89898	13.8924	15.9374	7.48331	6.16441	10.5357	11.9583	16.7929	10.198	8.42615	11.619	11.0905	7.2111	12.5698	11.7047	7.61577	12.7279	8.42615	6.63325	13.1149	14.1067	10.8628	13.6015	10.4881	NaN	7	7.61577	4.69042	10.6771	10.9087	6.32456	11.3137	9.16515	2.23607
ba	12.6491	6.55744	5.74456	14.3527	15.3297	11	9.11043	8.60233	10.9545	16.0935	9.64365	7.48331	13.0384	11.4891	10.7238	12.6886	10.7703	8.77496	8.88819	7.34847	5.74456	14.1774	12.49	14.5258	14.9666	9.11043	7	NaN	5.56776	6.55744	11.4455	11.225	9.94987	12.6095	7.4162	6.32456
ba	14.6629	3.16228	8.94427	16.4012	17.4929	10.7703	10.4881	12.53	13.6015	17.088	6.78233	5.74456	15	11.7047	9.27362	13.2665	10.7238	6.16441	12.49	3.60555	9.48683	17.3205	15.3297	15.3623	16.4621	11.3137	7.61577	5.56776	NaN	9.59166	14.4222	13.3791	11.0454	13.8564	8.60233	7.14143
ba	13.6015	10.6771	3.4641	12.1244	15.4919	9.89949	6.48074	8.66025	11.1803	16.1864	12.1655	9.84886	11	11.7898	9.69536	12.5698	12.2066	10.0995	11.6619	10.4403	3.74166	10.9545	12.53	11.8322	13.3791	9.89949	4.69042	6.55744	9.59166	NaN	8.60233	9.74679	7.74597	11.5758	8.48528	4.58258
ba	11.5326	14.8997	7.74597	6.245	12.2474	14.4914	11.3137	10.5357	8.544	17.6068	16.3095	12.8452	12.4499	14.7309	14.8324	15.6844	16.5227	16.1245	10.9545	15.3297	8.12404	7.61577	11.2694	15.0997	15.4596	9.48683	10.6771	11.4455	14.4222	8.60233	NaN	11.5326	12.6491	13.5647	12.083	11.7047
ba	16.4317	14.5258	10.8167	15.6205	17.1756	12.6095	12.6886	14.8997	15.0997	13.2288	11.7047	12.8841	9.16515	6.63325	11.5326	10.247	10.4881	13.1529	11.1803	12.2474	10.5357	12.0416	6.48074	12.2882	10.583	14.3875	10.9087	11.225	13.3791	9.74679	11.5326	NaN	10.8167	10.1489	10.247	10.7703
ba	18.3576	12.6491	8.94427	16.9411	19.4422	3.16228	9.69536	14.0357	16.1555	13.4164	11.5758	9.32738	7.93725	11.1803	6	10	10.7238	9.05539	13.1909	10.7238	9.79796	11.8322	15.0665	5.83095	9.74679	14.6969	6.32456	9.94987	11.0454	7.74597	12.6491	10.8167	NaN	8.7178	11.225	6.40312
ba	20.9523	15.8745	13.0384	17.9165	22.2711	9.48683	13.1909	17.2337	18.412	9.69536	11.5758	12.4499	5.19615	10.1489	10.6771	6	8.88819	12.7279	13.1149	12.53	12.5698	10.2956	14.5945	6.63325	3.87298	17.72	11.3137	12.6095	13.8564	11.5758	13.5647	10.1489	8.7178	NaN	10.7703	11.5326
ba	15.7797	11.0454	9.05539	14.3875	18.3848	12	12	10.8167	13.7477	12.8841	7.48331	8.88819	11.7898	8.30662	10.4881	8.94427	7.14143	8.48528	10.9545	7.54983	7.2111	13.8564	12.9228	13.784	13.1529	11.5758	9.16515	7.4162	8.60233	8.48528	12.083	10.247	11.225	10.7703	NaN	8.30662
ba	14.8997	8.77496	5.19615	15.0333	16.9411	7.54983	7.28011	10.198	12.8062	16.3401	9.53939	8.3666	11.8322	10.583	6.85565	11.9583	10.6771	6.40312	12.7671	7.61577	6.40312	13.8924	14.2127	11.0905	13.5647	11	2.23607	6.32456	7.14143	4.58258	11.7047	10.7703	6.40312	11.5326	8.30662	NaN
