# Supplementary material for: The contribution of temporal coding to odor coding and odor perception in humans
Source: eLife. 2020 Feb 7;9:e49734. doi: 10.7554/eLife.49734 (PMC7007219; doi:10.7554/eLife.49734)
Supplement: Figure 5—source data 1. [file elife-49734-fig5-data1.xlsx]

## Sheet: Figure5
ORG CIN - subj. told about TOMs				Figure 5A				CIT DMTS - subj. told about TOMs				Figure 5B
dt	numTrials	numValid	AvgIR	Score				dt	numTrials	numValid	AvgIR	Score
dt75	20	19	0.991636	0.631579				dt75	20	17	0.980615	0.588235
dt75	20	17	0.95971	0.352941				dt75	20	20	1	0.6
dt75	20	19	0.991289	0.578947				dt75	20	19	0.984882	0.421053
dt75	20	20	1	0.5				dt75	20	18	0.998454	0.611111
dt75	20	20	1	0.6				dt75	20	18	0.997362	0.555556
dt75	20	19	0.983636	0.578947				dt75	20	18	0.945408	0.444444
dt75	20	20	1	0.55				dt150	20	19	0.996671	0.421053
dt75	20	20	1	0.5				dt150	20	20	1	0.45
dt75	20	14	0.945182	0.5				dt150	20	17	0.985489	0.647059
dt150	20	20	1	0.4				dt150	20	20	1	0.55
dt150	20	20	1	0.6				dt150	20	19	0.985663	0.578947
dt150	20	18	0.973471	0.833333				dt150	20	17	0.961305	0.588235
dt150	20	20	1	0.75				dt150	20	16	0.958703	0.75
dt150	20	20	1	0.55				dt150	20	20	1	0.4
dt150	20	17	0.957846	0.470588				dt150	20	19	0.994	0.631579
dt150	20	20	1	0.6				dt150	20	19	0.989056	0.315789
dt150	20	18	0.979725	0.388889				dt300	20	19	0.994701	0.947368
dt150	20	17	0.981004	0.588235				dt300	20	19	0.989313	0.631579
dt150	20	20	1	0.7				dt300	20	20	1	0.75
dt150	20	18	0.970869	0.5				dt300	20	19	0.989464	0.894737
dt150	20	20	1	0.7				dt300	20	20	1	0.6
dt150	20	20	1	0.75				dt300	20	14	0.967799	0.785714
dt300	20	20	1	0.85				dt300	20	19	0.991	0.736842
dt300	20	20	1	0.8				dt300	20	17	0.988812	0.705882
dt300	20	20	1	0.95				dt300	20	20	1	0.7
dt300	20	20	1	0.7				dt600	20	19	0.996563	0.947368
dt300	20	18	0.993128	0.944444				dt600	20	17	0.991208	1
dt300	20	14	0.972125	0.785714				dt600	20	17	0.975562	0.941176
dt300	20	18	0.986819	0.944444				dt600	20	20	1	1
dt300	20	18	0.992768	0.888889				dt600	20	15	0.942937	0.8
dt300	20	19	0.987405	0.526316				dt600	20	19	0.990812	0.736842
dt300	20	17	0.994672	0.235294				dt600	20	18	0.972071	1
dt300	20	20	1	0.7
dt300	20	18	0.985403	0.611111
dt300	20	18	0.986624	0.777778
dt600	20	16	0.954935	1
dt600	20	16	0.983058	0.4375
dt600	20	14	0.966948	0.642857
dt600	20	19	0.988798	0.631579
dt600	20	17	0.979745	1
dt600	20	15	0.954314	0.666667
dt600	20	17	0.968072	0.705882
dt600	20	17	0.979686	0.823529
dt600	20	15	0.954496	0.6
dt600	20	14	0.957485	0.928571
dt600	20	17	0.986321	0.941176
dt600	20	18	0.97486	0.944444
dt600	20	16	0.979151	0.9375
CIT SULF
